# Supplementary material for: Lanthionine synthetase C–like protein 2 (LanCL2) is a novel regulator of Akt
Source: PubMed Central journal article supplement — Mol Biol Cell. 2014 Dec 1;25(24):3954–61. doi: 10.1091/mbc.E14-01-0004 (PMC4244203; doi:10.1091/mbc.e14-01-0004), 2014-12-01

# Supplemental Materials

*Molecular Biology of the Cell*

Zeng et al.

## **SUPPLEMENTAL FIGURE LEGENDS**

**Fig. S1. LanCL2 expression in various cell lines.** Lysates were prepared from cells maintained in growth medium, and subjected to Western analysis.

**Fig. S2. LanCL2 knockdown impairs NDRG1 phosphorylation.** HepG2 cells were infected with control (“C”) or LanCL2 shRNA (“L-1, L-2”) lentiviruses, and selected by puromycin. Cells were starved overnight and stimulated with 10% FBS for 10 min, followed by cell lysis and Western analysis.

Fig. S1. Zeng et al.

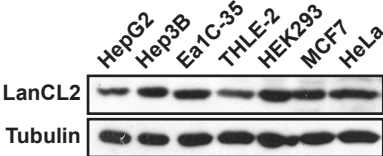

Fig. S2. Zeng et al.

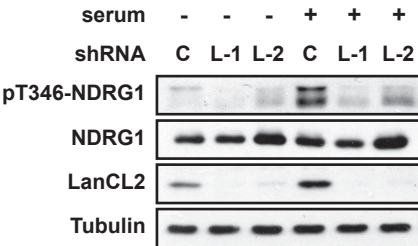

Supplement: supp_E14-01-0004v1_CombinedSupMats.pdf [file supp_E14-01-0004v1_CombinedSupMats.pdf]
